# Supplementary material for: Epigenetic Analysis through MSAP-NGS Coupled Technology: The Case Study of White Poplar Monoclonal Populations/Stands
Source: MDPI journal article supplement (doi:10.3390/ijms21197393), 2020-10-07

## Legend

- brown rendzinas
- xerorendzinas
- carbonate raw soils
- terra soils
- Armier complex
- L-Iklin and Tad-Dawl complexes
- built-over
- disturbed

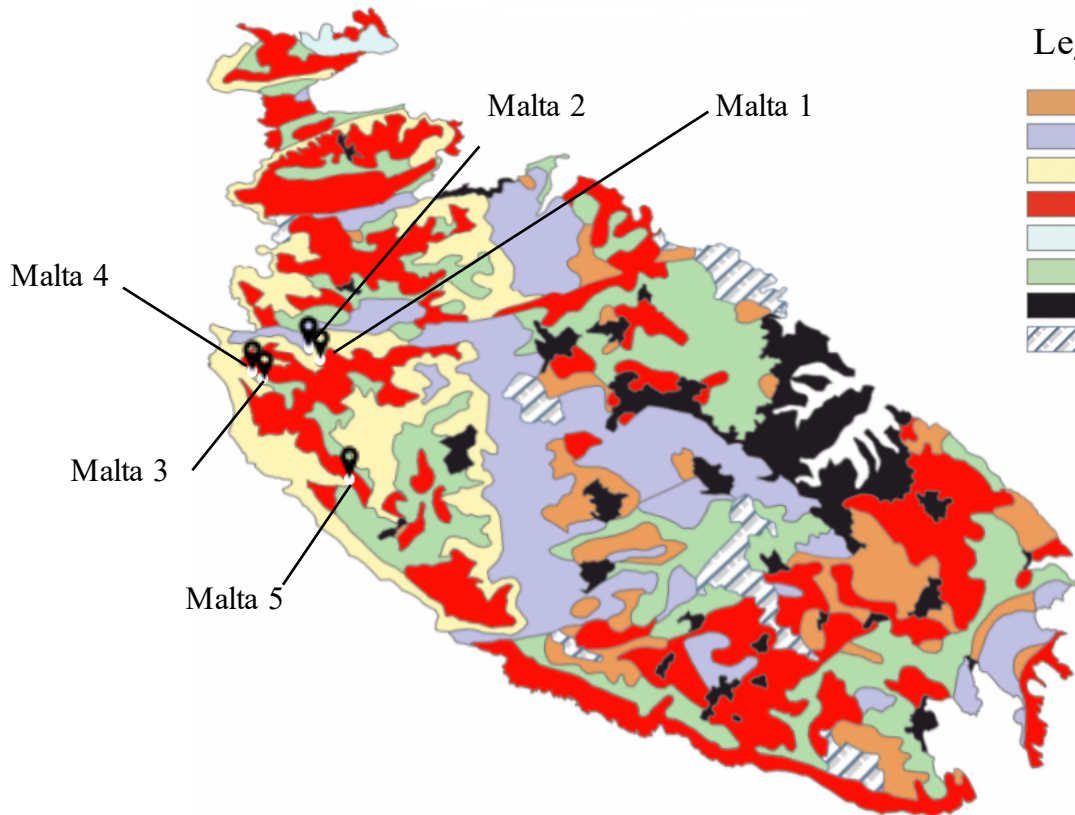

Supplement: s1 [file s1]
