# Supplementary material for: Epigenetic Analysis through MSAP-NGS Coupled Technology: The Case Study of White Poplar Monoclonal Populations/Stands
Source: MDPI journal article supplement (doi:10.3390/ijms21197393), 2020-10-07
Supplement: s1 [file s1]

A

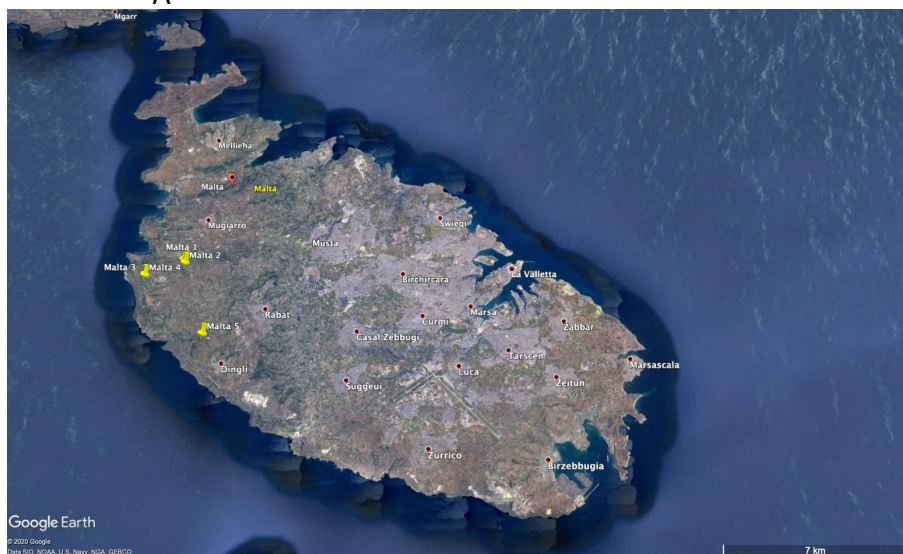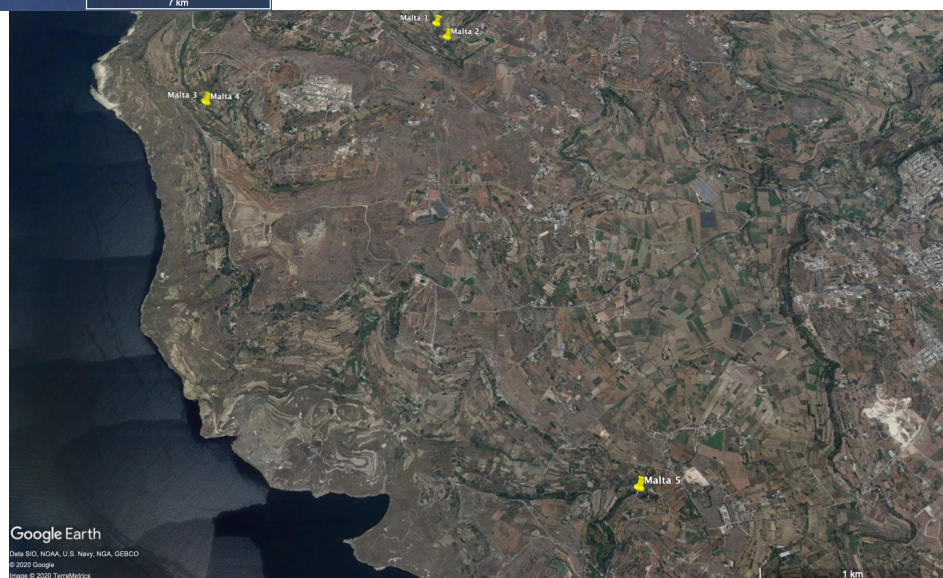

Figure SI 1. Geolocalization of the investigated white poplar trees, in yellow the placeholder where poplars were collected. A) Overview of Malta Island; B) Detail of the area where poplars were collected

| Name    | Latitude  | Longitude | Altitude asl (m) |
|---------|-----------|-----------|------------------|
| Malta 1 | 35.900268 | 14.356678 | 254              |
| Malta 2 | 35.899025 | 14.357558 | 178              |
| Malta 3 | 35.894149 | 14.338954 | 144              |
| Malta 4 | 35.894036 | 14.339035 | 144              |
| Malta 5 | 35.870093 | 14.370083 | 230              |
