# Supplementary figures and images for: Epigenetic Analysis through MSAP-NGS Coupled Technology: The Case Study of White Poplar Monoclonal Populations/Stands
Source: MDPI journal article supplement (doi:10.3390/ijms21197393), 2020-10-07

Distribution by gene type  
Chi-squared test  $P = 3.5E-10$  \*\*\*

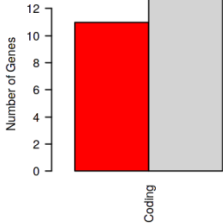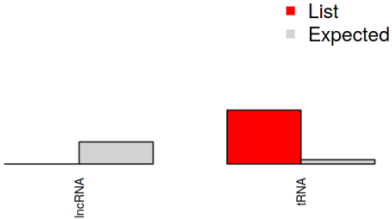

Supplement: s1 [file s1]

Distribution by gene type  
Chi-squared test  $P = 1.3E-167$  \*\*\*

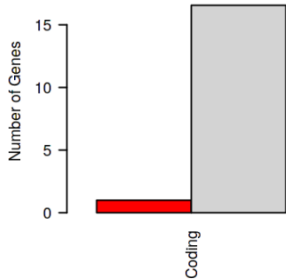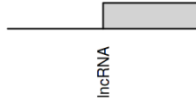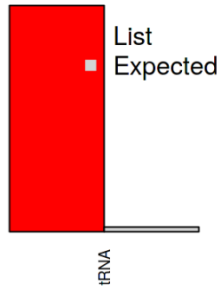

Supplement: s1 [file s1]
